# Supplementary material
Source: PubMed Central journal article supplement (PMC6071555)
Supplement: blood739086-suppl1.pdf [file blood739086-suppl1.pdf]

## **Supplemental Data**

### **Ponatinib efficacy and safety in Philadelphia chromosome–positive leukemia: Final 5-year results of the phase 2 PACE trial**

Jorge E Cortes, Dong-Wook Kim, Javier Pinilla-Ibarz, Philipp D le Coutre, Ronald Paquette, Charles Chuah, Franck E Nicolini, Jane F Apperley, H Jean Khoury, Moshe Talpaz, Daniel J DeAngelo, Elisabetta Abruzzese, Delphine Rea, Michele Baccarani, Martin C Müller, Carlo Gambacorti-Passerini, Stephanie Lustgarten, Victor M Rivera, Frank G Haluska, François Guilhot, Michael W Deininger, Andreas Hochhaus, Timothy P Hughes, Neil P Shah, and Hagop M Kantarjian

**Supplemental Table S1. Treatment-emergent arterial occlusive events (AOEs)\* reported in CP-CML patients and all patients**

|                                                   | CP-CML<br>n=270 |           |         | Total<br>N=449 |           |              |
|---------------------------------------------------|-----------------|-----------|---------|----------------|-----------|--------------|
|                                                   | Any<br>grade    | Grade 3/4 | Grade 5 | Any<br>grade   | Grade 3/4 | Grade 5      |
| <b>Patients with ≥1 AOE, n (%)</b>                | 84 (31)         | 49 (18)   | 3 (1)   | 111 (25)       | 66 (15)   | <b>5 (1)</b> |
| Angina pectoris                                   | 22 (8)          | 5 (2)     | 0       | 28 (6)         | 5 (1)     | 0            |
| Peripheral arterial occlusive disease             | 18 (7)          | 10 (4)    | 0       | 22 (5)         | 14 (3)    | 0            |
| Acute myocardial infarction/myocardial infarction | 10 (4)          | 9 (3)     | 1 (<1)  | 18 (4)         | 15 (3)    | 1 (<1)       |
| Coronary artery disease                           | 10 (4)          | 9 (3)     | 0       | 14 (3)         | 11 (2)    | 0            |
| Cerebrovascular accident                          | 9 (3)           | 1 (<1)    | 1 (<1)  | 11 (2)         | 2 (<1)    | 1 (<1)       |
| Intermittent claudication                         | 11 (4)          | 4 (2)     | 0       | 11 (2)         | 4 (1)     | 0            |
| Peripheral artery stenosis                        | 10 (4)          | 8 (3)     | 0       | 10 (2)         | 8 (2)     | 0            |
| Cerebral infarction                               | 8 (3)           | 7 (3)     | 0       | 8 (2)          | 7 (2)     | 0            |
| Acute coronary syndrome                           | 6 (2)           | 5 (2)     | 0       | 7 (2)          | 5 (1)     | 0            |
| Carotid artery stenosis                           | 7 (3)           | 5 (2)     | 0       | 7 (2)          | 5 (1)     | 0            |
| Peripheral arterial occlusion                     | 7 (3)           | 6 (2)     | 0       | 7 (2)          | 6 (1)     | 0            |
| Peripheral ischemia                               | 5 (2)           | 2 (1)     | 0       | 7 (2)          | 2 (<1)    | 1 (<1)       |

|                                  |        |        |   |        |        |        |
|----------------------------------|--------|--------|---|--------|--------|--------|
| Transient ischemic attack        | 6 (2)  | 0      | 0 | 6 (1)  | 0      | 0      |
| Coronary artery occlusion        | 4 (2)  | 4 (2)  | 0 | 5 (1)  | 5 (1)  | 0      |
| Peripheral vascular disorder     | 3 (1)  | 1 (<1) | 0 | 5 (1)  | 2 (<1) | 0      |
| Extremity necrosis               | 3 (1)  | 1 (<1) | 0 | 4 (1)  | 2 (<1) | 0      |
| Cerebral ischemia                | 1 (<1) | 0      | 0 | 3 (1)  | 1 (<1) | 1 (<1) |
| Coronary artery stenosis         | 2 (1)  | 2 (1)  | 0 | 3 (1)  | 2 (<1) | 0      |
| Ischemic cardiomyopathy          | 2 (1)  | 2 (1)  | 0 | 3 (1)  | 3 (1)  | 0      |
| Renal artery stenosis            | 2 (1)  | 2 (1)  | 0 | 3 (1)  | 3 (1)  | 0      |
| Unstable angina                  | 2 (1)  | 2 (1)  | 0 | 2 (<1) | 2 (<1) | 0      |
| Aphasia                          | 1 (<1) | 1 (<1) | 0 | 2 (<1) | 1 (<1) | 0      |
| Carotid artery occlusion         | 2 (1)  | 0      | 0 | 2 (<1) | 0      | 0      |
| Cerebral artery stenosis         | 2 (1)  | 2 (1)  | 0 | 2 (<1) | 2 (<1) | 0      |
| Dry gangrene                     | 2 (1)  | 1 (<1) | 0 | 2 (<1) | 1 (<1) | 0      |
| Dysarthria                       | 2 (1)  | 0      | 0 | 2 (<1) | 0      | 0      |
| Myocardial ischemia              | 2 (1)  | 1 (<1) | 0 | 2 (<1) | 1 (<1) | 0      |
| Splenic infarction               | 1 (<1) | 1 (<1) | 0 | 2 (<1) | 1 (<1) | 0      |
| Vertebral artery stenosis        | 1 (<1) | 0      | 0 | 2 (<1) | 0      | 0      |
| Coronary artery arteriosclerosis | 1 (<1) | 1 (<1) | 0 | 1 (<1) | 1 (<1) | 0      |
| Coronary arteriospasm            | 1 (<1) | 0      | 0 | 1 (<1) | 0      | 0      |

|                                         |        |        |        |        |        |        |
|-----------------------------------------|--------|--------|--------|--------|--------|--------|
| Increased blood creatine phosphokinase  | 1 (<1) | 0      | 0      | 1 (<1) | 0      | 0      |
| Cardiac discomfort                      | 1 (<1) | 1 (<1) | 0      | 1 (<1) | 1 (<1) | 0      |
| Carotid arteriosclerosis                | 1 (<1) | 0      | 0      | 1 (<1) | 0      | 0      |
| Cerebellar infarction                   | 0      | 0      | 0      | 1 (<1) | 1 (<1) | 0      |
| Cerebral arteriosclerosis               | 1 (<1) | 0      | 0      | 1 (<1) | 0      | 0      |
| Cerebrovascular disorder                | 1 (<1) | 1 (<1) | 0      | 1 (<1) | 1 (<1) | 0      |
| Cerebrovascular insufficiency           | 1 (<1) | 0      | 0      | 1 (<1) | 0      | 0      |
| Celiac artery occlusion                 | 0      | 0      | 0      | 1 (<1) | 1 (<1) | 0      |
| Coronary vascular graft occlusion       | 1 (<1) | 0      | 0      | 1 (<1) | 0      | 0      |
| Electrocardiogram ST segment depression | 1 (<1) | 0      | 0      | 1 (<1) | 0      | 0      |
| Electrocardiogram T wave inversion      | 1 (<1) | 0      | 0      | 1 (<1) | 0      | 0      |
| Arterial embolism                       | 0      | 0      | 0      | 1 (<1) | 1 (<1) | 0      |
| Hemorrhagic cerebral infarction         | 1 (<1) | 0      | 1 (<1) | 1 (<1) | 0      | 1 (<1) |
| Hemorrhagic transformation stroke       | 1 (<1) | 0      | 0      | 1 (<1) | 0      | 0      |
| Hemiparesis                             | 1 (<1) | 0      | 0      | 1 (<1) | 0      | 0      |
| Hemiplegia                              | 1 (<1) | 1 (<1) | 0      | 1 (<1) | 1 (<1) | 0      |
| Lacunar infarction                      | 1 (<1) | 1 (<1) | 0      | 1 (<1) | 1 (<1) | 0      |
| Mesenteric arterial occlusion           | 0      | 0      | 0      | 1 (<1) | 0      | 1 (<1) |
| Monoparesis                             | 1 (<1) | 0      | 0      | 1 (<1) | 0      | 0      |

|                             |        |        |   |        |        |   |
|-----------------------------|--------|--------|---|--------|--------|---|
| Myocardial necrosis         | 1 (<1) | 1 (<1) | 0 | 1 (<1) | 1 (<1) | 0 |
| Poor peripheral circulation | 1 (<1) | 1 (<1) | 0 | 1 (<1) | 1 (<1) | 0 |
| Retinal artery occlusion    | 1 (<1) | 1 (<1) | 0 | 1 (<1) | 1 (<1) | 0 |
| Stress cardiomyopathy       | 0      | 0      | 0 | 1 (<1) | 1 (<1) | 0 |
| Subclavian artery stenosis  | 0      | 0      | 0 | 1 (<1) | 0      | 0 |
| Increased troponin          | 1 (<1) | 0      | 0 | 1 (<1) | 0      | 0 |

---

\*Categorization of AOE is based on a broad collection of >300 MedDRA preferred terms related to vascular ischemia or thrombosis.

**Supplemental Table S2. Patients with a first arterial occlusive event (AOE) after October 2013 following prospective dose reduction to 15 mg**

| <b>Patient</b> | <b>Time to first AOE following dose reduction (days)</b> | <b>First AOE</b>                      | <b>Grade</b> | <b>Action taken with study treatment</b> |
|----------------|----------------------------------------------------------|---------------------------------------|--------------|------------------------------------------|
| 1              | 856                                                      | Peripheral vascular disorder          | 1            | No dose modification                     |
| 2              | 183                                                      | Angina pectoris                       | 2            | No dose modification                     |
| 3              | 53                                                       | Cerebral artery stenosis              | 3            | Discontinued treatment                   |
| 4              | 239                                                      | Peripheral artery occlusion           | 3            | No dose modification                     |
| 5              | 70                                                       | Carotid arteriosclerosis              | 1            | No dose modification                     |
| 6              | 715                                                      | Electrocardiogram<br>T wave inversion | 1            | No dose modification                     |
| 7              | 112                                                      | Coronary artery occlusion             | 3            | Drug interrupted                         |
| 8              | 428                                                      | Peripheral vascular disorder          | 1            | No dose modification                     |
| 9              | 351                                                      | Peripheral artery stenosis            | 3            | Discontinued treatment                   |
| 10             | 519                                                      | Angina pectoris                       | 2            | Dose reduction                           |

**Supplemental Figure S1. Time to first response in all evaluable patients with CP-CML, overall and among patients resistant or intolerant to previous treatment with dasatinib or nilotinib or with the BCR-ABL1<sup>T315I</sup> mutation. (A) Time to first MCyR (12 months), (B) time to first CCyR (12 months), and (C) time to first MMR (up to 5 years). Time to first response for all patients was analyzed using a cumulative incidence function. In (A) and (C), point estimates for cumulative incidence by 3 and 6 months and 95% confidence intervals are shown.**

(A) Time to MCyR

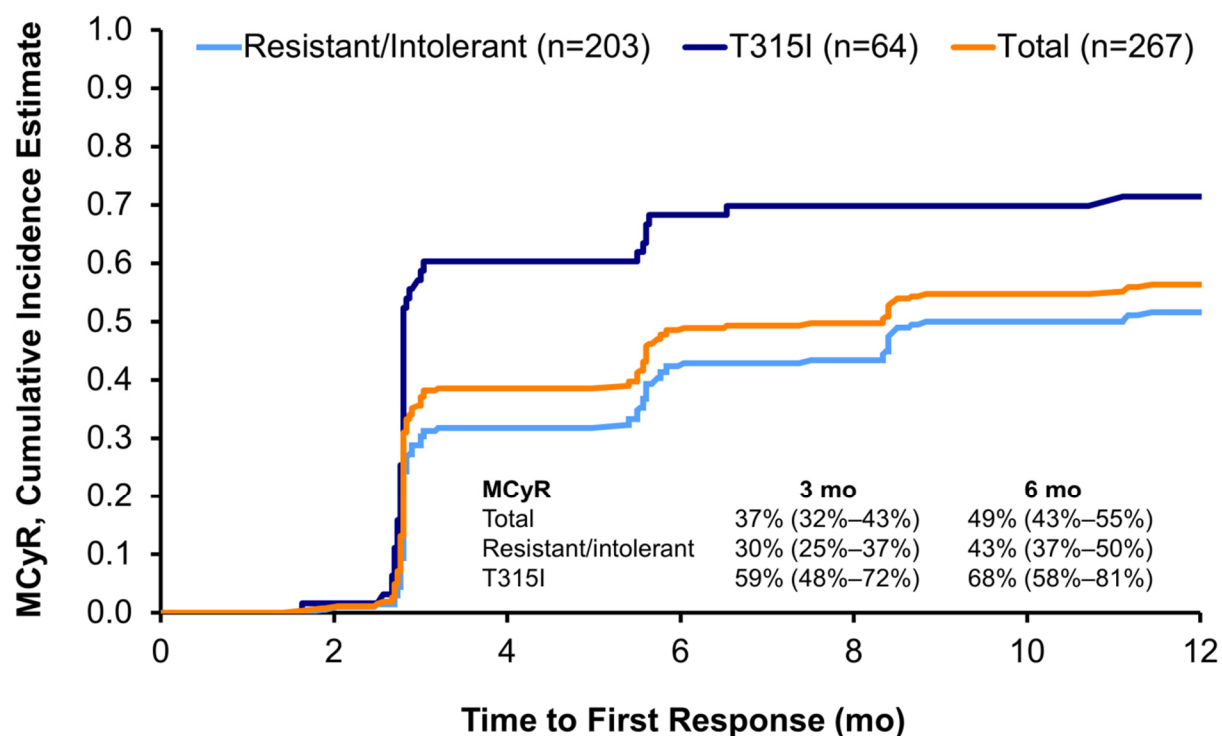

(B) Time to CCyR

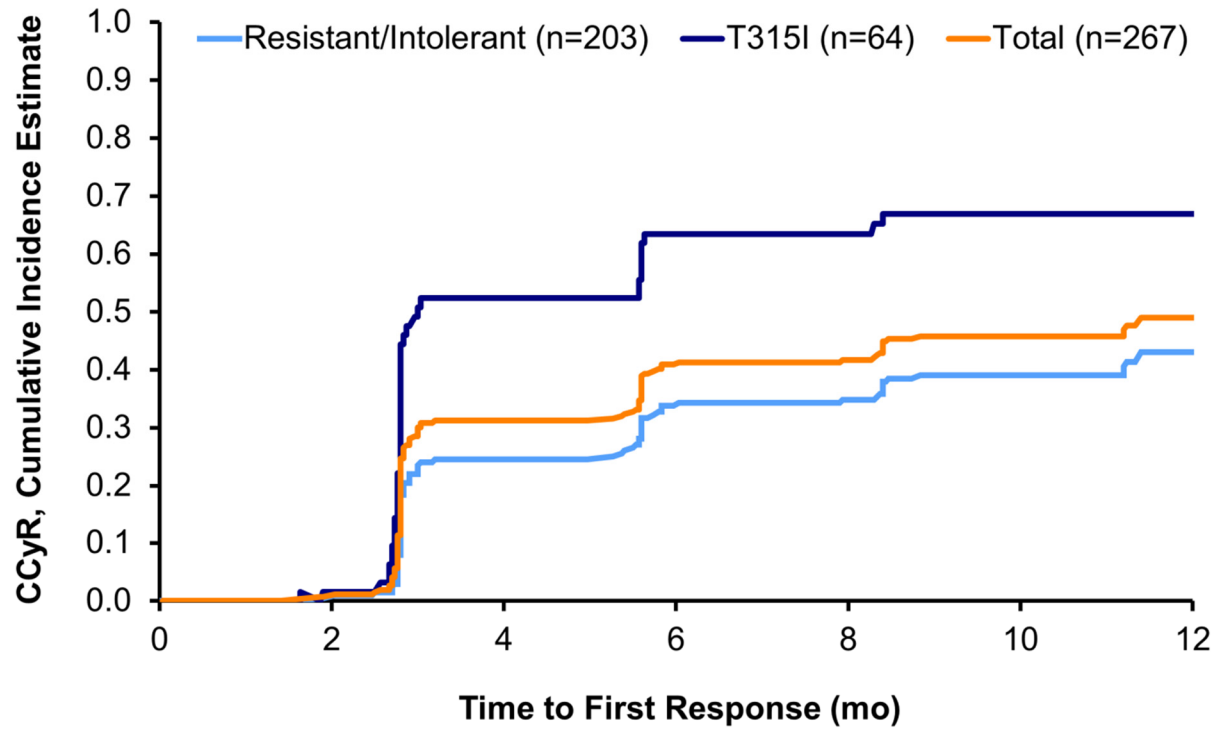



(C) Time to MMR

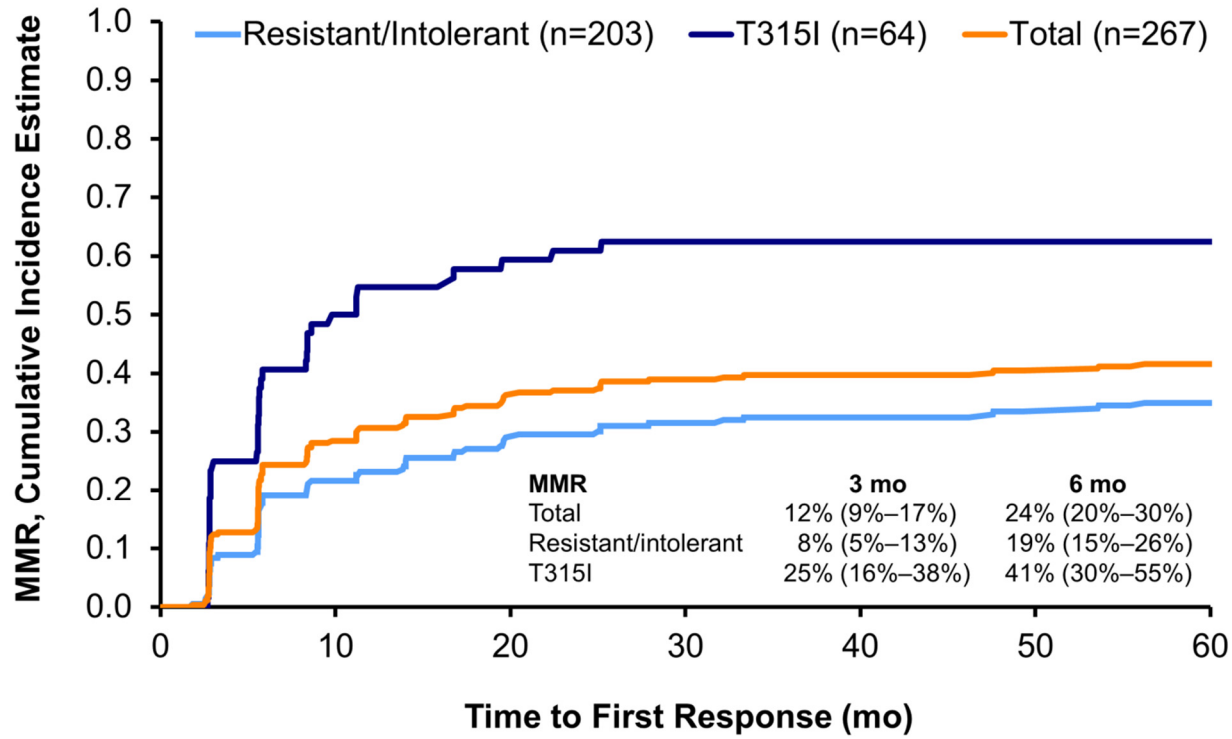

**Supplemental Figure S2. Relative risk of serious arterial occlusive events by risk category (N=449).**

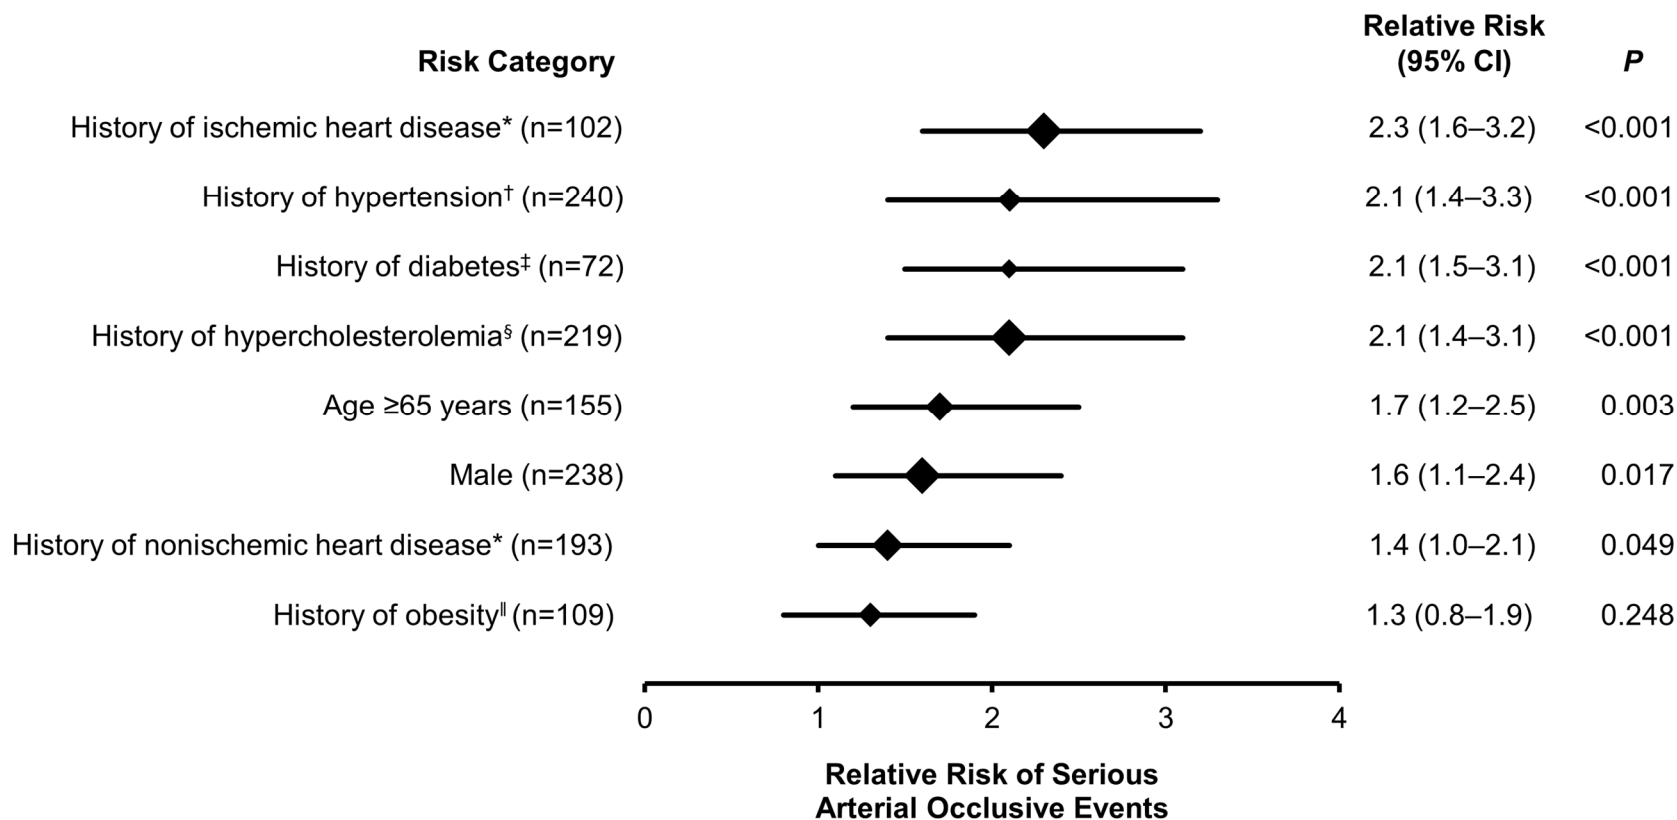

To calculate the relative risk of serious arterial occlusive events for each risk category, the frequency of serious arterial occlusive events in patients in the risk category was divided by the frequency in patients not in the risk category. For example, the frequency of serious arterial occlusive events was 27% (64/240) in patients with a history of hypertension and 12% (26/209) in patients without a

history of hypertension (240 + 209 = total N = 449), so the relative risk of serious arterial occlusive events in patients with versus without hypertension was 2.1.

\*Includes medical history and/or prior concomitant medication.

†Includes medical history, prior concomitant medication, and/or baseline blood pressure grade  $\geq 2$ .

‡Includes medical history, prior concomitant medication, and/or baseline glucose grade  $\geq 2$ .

§Includes medical history, prior concomitant medication, and/or baseline triglycerides grade  $\geq 1$ .

¶Includes medical history and/or baseline body mass index  $\geq 30$  kg/m<sup>2</sup>.
